# Supplementary material for: Plasma extracellular vesicles microRNA-208b-3p and microRNA-143-3p as novel biomarkers for sudden cardiac death prediction in acute coronary syndrome
Source: Royal Society of Chemistry journal article supplement (doi:10.1039/d2mo00257d), 2023-01-11
Supplement: d2mo00257d1.xlsx [file d2mo00257d1.xlsx]

## Sheet: Up-regulated miRNAs
1-5:SCD group;6-10:HC group
	1			2			3			4			5			6			7			8			9			10
U6	28.75	28.69	28.72	27.43	27.56	27.69	27.06	26.83	27.03	27.13	27.35	27.56	27	27.09	26.93	27.01	26.78	26.87	27.09	26.71	26.9	27.2	27	27.3	27.38	27.14	27.26	30.94	30.84	30.89
miR-208b-3P	26	25.74	26.26	25.61	26.17	25.67	25.17	25.1	25.24	24.32	24.91	24.62	27.69	27.83	27.76	35.27	35.55	35.41	34.27	34.32	34.36	32.45	32.63	32.27	32.5	32.61	32.59	31.59	31.35	31.47
	1			2			3			4			5			6			7			8			9			10
U6	28.75	28.69	28.72	27.43	27.56	27.69	27.06	26.83	27.03	27.13	27.35	27.56	27	27.09	26.93	27.01	26.78	26.87	27.09	26.71	26.9	27.2	27	27.3	27.38	27.14	27.26	30.94	30.84	30.89
miR-143-3P	26.89	26.86	26.91	29.08	28.99	29.17	25.13	25.65	25.57	27.73	28.33	28.03	26.63	26.58	26.67	33.89	34.05	34.21	33.04	32.85	33.22	31.37	31.12	31.61	31.55	31.68	31.96	32.11	31.97	31.88
	1			2			3			4			5			6			7			8			9			10
U6	28.18	28.07	28.13	29.61	29.44	29.34	27.27	27.2	27.32	31.88	31.68	31.78	29.58	29.23	29.41	28.82	29.13	28.95	23.28	23.31	23.29	30.77	30.54	30.31	27.21	26.95	27.08	30.94	31.11	30.84
miR-145-3P	25.95	25.83	25.53	24.29	24.33	23.95	23.08	22.94	23.22	28.33	28.68	28.38	26.81	26.56	26.49	28.2	28.02	28.37	23.2	23.45	23.15	27.32	27.27	27.33	28.4	28.16	28.28	29.77	29.88	29.83
	1			2			3			4			5			6			7			8			9			10
U6	28.18	28.07	28.13	29.61	29.44	29.34	27.27	27.2	27.32	31.88	31.68	31.78	29.58	29.23	29.41	28.82	29.13	28.95	23.28	23.31	23.29	30.77	30.54	30.31	27.21	26.95	27.08	30.94	31.11	30.84
miR-145-5P	25.83	25.81	25.81	24.03	24.33	23.92	23.05	23.29	23.29	27.81	27.87	27.93	26.51	26.53	26.57	28.62	29.51	29.07	23.7	23.86	24.18	29.71	29.53	29.62	28.21	27.91	28.39	30.67	30.34	30.31
	1			2			3			4			5			6			7			8			9			10
U6	30.16	30.31	30.4	24.65	24.23	24.44	28.71	28.93	29.18	26.18	26.08	25.97	25.51	25.47	25.43	31.32	31.11	31.27	30.66	30.48	30.57	26.17	25.99	26.35	27.06	27.57	27.32	22.08	22	21.91
miR-152-3P	33.99	34.05	34.04	20.24	20.24	20.23	32.27	32.28	32.37	18.85	18.93	19	21.3	21.38	21.34	35.3	35.76	35.53	37.71	37.57	37.41	21.68	21.58	21.63	21.07	21.1	21.07	18.37	18.32	18.24

## Sheet: Down-regulated miRNAs
	1			2			3			4			5			6			7			8			9			10
U6	28.32	28.18	28.68	29.85	29.76	29.89	27.27	27.36	27.41	27.05	26.68	27.12	25.59	25.96	25.78	29.56	29.68	29.62	29.68	29.83	29.76	27.76	27.88	28.02	28.79	29.02	28.91	24.47	24.45	24.46
miR-144-5P	33.27	33.34	33.31	32.75	32.51	32.63	34.41	34.73	34.09	23.58	23.49	23.54	20.11	20.41	20.26	30.64	30.83	30.88	31.69	31.62	31.55	21.05	21.24	20.88	20.55	20.72	20.89	17.98	18.21	18.1
	1			2			3			4			5			6			7			8			9			10
U6	28.32	28.18	28.68	29.85	29.76	29.89	27.27	27.36	27.41	27.05	26.68	27.12	25.59	25.96	25.78	29.56	29.68	29.62	29.68	29.83	29.76	27.76	27.88	28.02	28.79	29.02	28.91	24.47	24.45	24.46
miR-182-5P	32.34	32.23	32.29	32.31	32.45	32.17	33.99	33.83	33.67	23.73	23.32	23.53	21.04	21.12	21.19	30.52	30.99	30.91	31.43	31.41	31.11	20.15	20.43	20.29	20.16	20.68	20.42	19.09	19.13	19.11
	1			2			3			4			5			6			7			8			9			10
U6	28.58	28.45	28.74	21.6	21.45	21.53	26.85	26.64	26.75	26.83	26.76	26.8	26.35	26.17	25.27	29.28	29.25	29.18	28.36	28.04	27.97	29.25	29.26	29.18	28.87	29.01	28.94	28.87	29.02	28.95
miR-144-3P	34.42	34.53	34.48	22.53	22.48	22.24	25.54	25.66	25.41	21.14	21.42	21.2	20.17	20.54	20.36	26.09	26.26	25.91	24.67	24.64	24.44	25.31	24.66	24.99	20.64	20.99	20.82	21.43	21.42	21.43
	1			2			3			4			5			6			7			8			9			10
U6	28.58	28.45	28.74	21.6	21.45	21.53	26.85	26.64	26.75	25.51	25.19	25.35	25.21	24.73	24.97	29.28	29.25	29.18	28.36	28.04	27.97	28.82	28.66	28.5	28.76	28.29	28.53	28.43	28.8	28.24
miR-183-5P	34.24	34.53	34.7	21.19	21.1	21.48	24.36	24.28	24.44	19.16	19.03	19.24	18.37	18.25	18.12	26.5	26.04	26.07	25.37	25.53	25.68	22.84	22.99	23.14	19.04	19.49	19.27	19.89	19.98	19.62
	1			2			3			4			5			6			7			8			9			10
U6	28.58	28.45	28.74	21.6	21.45	21.53	26.85	26.64	26.75	25.51	25.19	25.35	25.21	24.73	24.97	29.28	29.25	29.18	28.36	28.04	27.97	28.82	28.66	28.5	28.76	28.29	28.53	28.43	28.8	28.24
miR-96-5P	34.68	34.79	34.74	22.36	21.91	22.09	30.4	30.32	30.24	18.86	18.75	18.81	19.25	19.34	19.42	26.39	26.57	26.19	24.46	24.43	24.4	22.77	22.56	22.67	19.41	19.56	19.56	20.5	20.18	20.34
