# Supplementary material for: Plasma extracellular vesicles microRNA-208b-3p and microRNA-143-3p as novel biomarkers for sudden cardiac death prediction in acute coronary syndrome
Source: Royal Society of Chemistry journal article supplement (doi:10.1039/d2mo00257d), 2023-01-11
Supplement: d2mo00257d3.pdf [file d2mo00257d3.pdf]

**Plasma extracellular vesicles microRNA-208b-3p and microRNA-143-3p as novel  
biomarkers for sudden cardiac death prediction in acute coronary syndrome**

Shuainan Huang<sup>a,1</sup>, Jiahui Zhang<sup>b,1</sup>, Hua Wan<sup>c,1</sup>, Kang Wang<sup>a</sup>, Jiayi Wu<sup>a</sup>, Yue Cao<sup>a</sup>, Li Hu<sup>a</sup>, Yanfang

Yu<sup>a</sup>, Hao Sun<sup>b</sup>, Youjia Yu<sup>a,#</sup>, Jie Wang<sup>a,#</sup>, and Feng Chen<sup>a,d,#</sup>

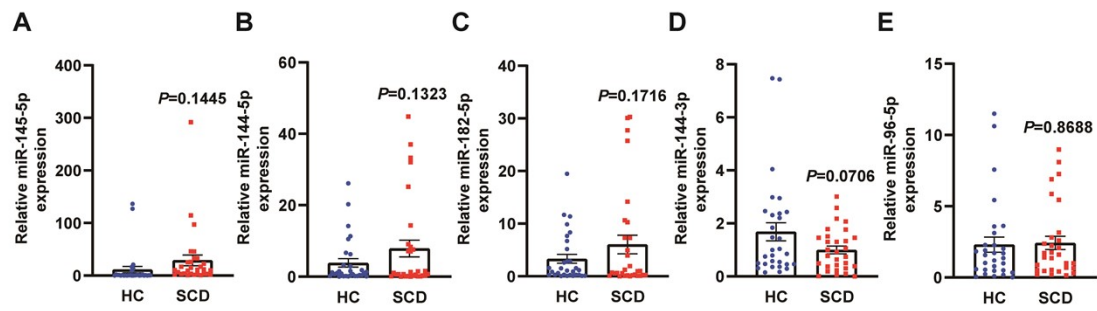

Supplemental Figure 1: RT-qPCR expression analysis of miR-145-5p, miR-144-5p, miR-182-5p, miR-144-3p and miR-96-5p in plasma EVs from HC group (n =30) and SCD group (n =30). Significance was determined by Student's *t* test. All graphs are shown as mean±SEM. RT-qPCR, reverse transcription and real-time quantitative polymerase chain reaction; EVs, extracellular vesicles; HC, healthy control; SCD, sudden cardiac death.

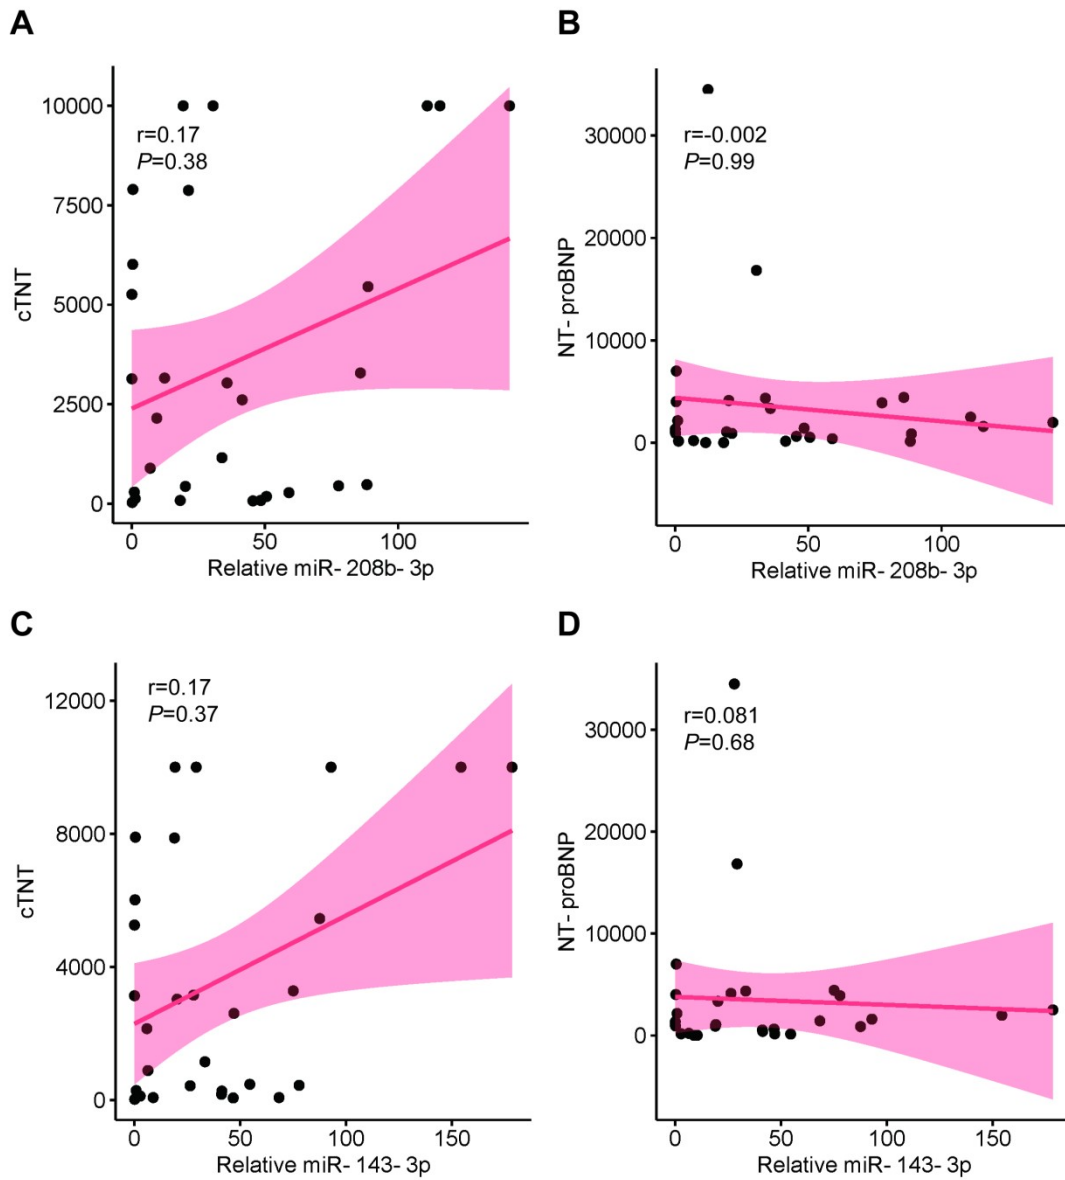

Supplemental Figure 2: Correlations between cTnT, NT-proBNP and the expression levels of plasma EVs miR-208b-3p, miR-143-3p. EVs, extracellular vesicles; cTnT, troponin T; NT-proBNP, N-terminal pro-B natriuretic peptide.
