# Supplementary material for: Plasma extracellular vesicles microRNA-208b-3p and microRNA-143-3p as novel biomarkers for sudden cardiac death prediction in acute coronary syndrome
Source: Royal Society of Chemistry journal article supplement (doi:10.1039/d2mo00257d), 2023-01-11
Supplement: d2mo00257d4.xlsx [file d2mo00257d4.xlsx]

## Sheet: Supplemental Table1
Primers used in reverse transcription
Gene Name	Primer sequences(5'-3')
miR-208b-3p	GTCGTATCCAGTGCGTGTCGTGGAGTCGGCAATTGCACTGGATACGACACAAACC
miR-143-3p	GTCGTATCCAGTGCGTGTCGTGGAGTCGGCAATTGCACTGGATACGACAGAGCTA
miR-145-3p	GTCGTATCCAGTGCGTGTCGTGGAGTCGGCAATTGCACTGGATACGACAAGAACA
miR-145-5p	GTCGTATCCAGTGCGTGTCGTGGAGTCGGCAATTGCACTGGATACGACGGATTCC
miR-152-3p	GTCGTATCCAGTGCGTGTCGTGGAGTCGGCAATTGCACTGGATACGACCCAAGTT
miR-144-5p	GTCGTATCCAGTGCGTGTCGTGGAGTCGGCAATTGCACTGGATACGACACTTACA
miR-182-5p	GTCGTATCCAGTGCGTGTCGTGGAGTCGGCAATTGCACTGGATACGACTGAGTTC
miR-144-3p	GTCGTATCCAGTGCGTGTCGTGGAGTCGGCAATTGCACTGGATACGACAGTACAT
miR-183-5p	GTCGTATCCAGTGCGTGTCGTGGAGTCGGCAATTGCACTGGATACGACAGTGAAT
miR-96-5p	GTCGTATCCAGTGCGTGTCGTGGAGTCGGCAATTGCACTGGATACGACCAAAAAT

## Sheet: Supplemental Table2
Primers used in quantitative real-time PCR
Gene Name	Primer sequences(forward)(5'-3')	Primer sequences(reverse)(5'-3')
miR-208b-3p	ggggATAAGACGAACAAAAGG	CAGTGCGTGTCGTGGAGT
miR-143-3p	ggggTGAGATGAAGCACTGTA	CAGTGCGTGTCGTGGAGT
miR-145-3p	ggggATTCCTGGAAATACTG	CAGTGCGTGTCGTGGAGT
miR-145-5p	ggGTCCAGTTTTCCCAGG	CAGTGCGTGTCGTGGAGT
miR-152-3p	ggggTCAGTGCATGACAGA	CAGTGCGTGTCGTGGAGT
miR-144-5p	cgggGGATATCATCATATACTG	CAGTGCGTGTCGTGGAGT
miR-182-5p	ggggTTTGGCAATGGTAGA	CAGTGCGTGTCGTGGAGT
miR-144-3p	ggcgggcTACAGTATAGATGAT	CAGTGCGTGTCGTGGAGT
miR-183-5p	ggggTATGGCACTGGTAGAAT	CAGTGCGTGTCGTGGAGT
miR-96-5p	gggTTTGGCACTAGCACAT	CAGTGCGTGTCGTGGAGT
U6	CTCGCTTCGGCAGCACA	AACGCTTCACGAATTTGCGT

## Sheet: Supplemental Table3
miR_name	miR_seq	up/down	fold_change(SCD(mean)/control(mean))	log2(fold_change)	pvalue(t_test)	control(mean)	SCD(mean)	SCD/SCD1(norm)	SCD/SCD2(norm)	SCD/SCD3(norm)	control/control1(norm)	control/control2(norm)	control/control3(norm)	SCD/SCD1(raw)	SCD/SCD2(raw)	SCD/SCD3(raw)	control/control1(raw)	control/control2(raw)	control/control3(raw)	Expression level
hsa-miR-208b-3p	ATAAGACGAACAAAAGGTTTGT	up	5376.57	12.3925	0.0402391	10.7342	57713.5	34989.5	75422.7	62728.3	10.8165	8.33864	13.0476	45795	124777	152191	5	5	8	high
hsa-miR-143-3p	TGAGATGAAGCACTGTAGCTCT	up	13.817	3.78837	0.00209921	19120.7	264190	255966	289661	246945	22426.9	20643.1	14292.1	335014	479206	599136	10367	12378	8763	high
hsa-miR-145-3p	ATTCCTGGAAATACTGTTCTT	up	10.9899	3.45811	0.0133229	1080.92	11879.2	12892.5	13423.2	9322.01	1228.75	1174.08	839.942	16874	22207	22617	568	704	515	high
hsa-miR-145-5p	GTCCAGTTTTCCCAGGAATCC	up	7.35082	2.87791	0.0262498	1892.69	13912.9	16269.6	15557.6	9911.41	2200.07	1664.39	1813.62	21294	25738	24047	1017	998	1112	high
hsa-miR-152-3p	TCAGTGCATGACAGAACTTGG	up	6.29944	2.65522	0.0142881	4009.12	25255.2	25243.3	30033.4	20488.9	3878.78	4896.45	3252.12	33039	49686.3	49710	1793	2936	1994	high
hsa-miR-27b-3p	TTCACAGTGGCTAAGTTCTGC	up	5.16759	2.36949	0.0219299	86359.6	446271	368531	558464	411817	84098	104556	70425.2	482342	923906	999148	38875	62693.5	43180.3	high
hsa-miR-22-5p	AGTTCTTCAGTGGCAAGCTTT	up	4.74181	2.24544	0.0312691	1882.94	8928.57	9763.74	10610.7	6411.28	1998.88	1769.46	1880.49	12779	17554	15555	924	1061	1153	high
hsa-miR-146a-5p	TGAGAACTGAATTCCATGGGTT	up	4.0993	2.03538	0.0245405	38569.4	158107	188695	120087	165540	40783.5	43095.8	31828.9	246968	198668	401633	18852.5	25841	19515.5	high
hsa-miR-24-3p	TGGCTCAGTTCAGCAGGAAC	up	4.03634	2.01305	0.0209935	24486.9	98837.5	83393.6	121243	91876	27823.2	23604.2	22033.4	109148	200580	222909	12861.5	14153.5	13509.5	high
hsa-miR-221-3p	AGCTACATTGTCTGCTGGGTTT	up	3.48839	1.80256	0.0192601	62793.8	219049	214545	180976	261626	70101.5	61971.1	56308.7	280801	299402	634755	32405	37159	34525	high
hsa-miR-1307-5p	TCGACCGGACCTCGACCGGCT	up	3.41291	1.771	0.0446658	2198.99	7504.96	8172.99	9172.07	5169.83	2580.81	2031.29	1984.87	10697	15174	12543	1193	1218	1217	high
hsa-miR-199b-3p	ACAGTAGTCTGCACATTGGTT	up	3.08963	1.62743	0.0496761	9555.33	29522.4	27704	22419.6	38443.6	9425.46	10583.4	8657.11	36259.7	37090.3	93271.7	4357	6346	5308	high
hsa-miR-361-5p	TTATCAGAATCTCCAGGGGTAC	up	3.04839	1.60805	0.00100371	4664.64	14219.7	14820.2	13849.4	13989.4	3619.19	5780.35	4594.4	19397	22912	33941	1673	3466	2817	high
hsa-miR-340-5p	TTATAAAGCAATGAGACTGATT	up	2.89122	1.53168	0.00364478	11925.9	34480.4	37206.7	30473.8	35760.5	11908.9	13303.5	10565.3	48697	50415	86762	5505	7977	6478	high
hsa-miR-423-3p	AGCTCGGTCTGAGGCCCCTCAGT	up	2.53653	1.34285	0.019962	15580.8	39521	46909.3	35222.5	36431.1	16101.4	16500.5	14140.4	61396	58271	88389	7443	9894	8670	high
hsa-miR-28-3p	CACTAGATTGTGAGCTCCTGGA	up	2.16328	1.11322	0.0104261	4139.63	8955.16	7392.14	9499.69	9973.65	3515.35	5480.16	3423.37	9675	15716	24198	1625	3286	2099	high
hsa-miR-99b-5p	CACCCGTAGAACCGACCTTGC	up	2.03559	1.02545	0.0412978	7810.41	15898.8	13680.2	19936.9	14079.3	9524.98	7134.54	6771.72	17905	32983	34159	4403	4278	4152	high
hsa-miR-671-5p	AGGAAGCCCTGGAGGGGCTGGAG	up	25.5281	4.67402	0.0301403	6.8674	175.312	165.034	232.717	128.184	10.8165	0	9.78573	216	385	311	5	0	6	middle
hsa-miR-452-5p	AACTGTTTGCAGAGGAAACTGA	up	16.3632	4.03239	0.0481055	197.278	3228.11	2600.05	4608.4	2475.89	224.982	216.805	150.048	3403	7624	6007	104	130	92	middle
hsa-miR-125b-1-3p	ACGGGTTAGGCTCTTGGGAGT	up	14.0737	3.81493	0.0261226	9.38917	132.141	119.955	175.898	100.569	0	20.0127	8.15477	157	291	244	0	12	5	middle
hsa-miR-200a-3p	TAACACTGTCTGGTAACGATGT	up	7.94297	2.98968	0.00933327	463.017	3677.73	4408.92	3187.62	3436.66	436.985	647.079	304.988	5770.5	5273.5	8338	202	388	187	middle
hsa-miR-146a-3p	ACCTCTGAAATTCAGTTCTTC	up	7.70282	2.94539	0.000708731	115.219	887.511	994.787	880.093	787.653	23.7962	173.444	148.417	1302	1456	1911	11	104	91	middle
hsa-miR-136-5p	ACTCCATTTGTTTTGATGATGG	up	7.67798	2.94073	0.0127775	24.4368	187.625	148.225	198.263	216.388	17.3063	25.0159	30.9881	194	328	525	8	15	19	middle
hsa-miR-34a-5p	TGGCAGTGTCTTAGCTGGTTGT	up	7.34154	2.87608	0.0371624	260.824	1914.85	2289.08	2200.84	1254.64	309.351	228.479	244.643	2996	3641	3044	143	137	150	middle
hsa-miR-429	TAATACTGTCTGGTAAAACCGT	up	7.27773	2.86349	0.011718	193.892	1411.09	1257.62	1291.13	1684.53	164.41	210.134	207.131	1646	2136	4087	76	126	127	middle
hsa-miR-136-3p	CATCATCGTCTCAAATGAGTCT	up	6.62626	2.72819	0.0206051	309.708	2052.2	1830.65	1749.91	2576.05	367.76	310.197	251.167	2396	2895	6250	170	186	154	middle
hsa-miR-24-1-5p	GTGCCTACTGAGCTGATATCA	up	6.40747	2.67975	0.0437657	103.275	661.729	451.933	903.667	629.587	38.9393	117.575	153.31	591.5	1495	1527.5	18	70.5	94	middle
hsa-miR-377-3p	ATCACACAAAGGCAACTTTTGT	up	6.33287	2.66286	0.0425679	98.7457	625.344	567.686	464.225	844.12	86.5317	116.741	92.9644	743	768	2048	40	70	57	middle
hsa-miR-127-5p	GAAGCTCAGAGGGCTCTGATT	up	6.09577	2.60781	0.0026192	19.6656	119.877	132.18	129.354	98.096	10.8165	40.0255	8.15477	173	214	238	5	24	5	middle
hsa-miR-214-3p	ACAGCAGGCACAGACAGGCAG	up	5.58284	2.481	0.031914	230.278	1285.6	1240.05	1656.82	959.94	272.575	255.162	163.095	1623	2741	2329	126	153	100	middle
hsa-miR-200c-3p	TAATACTGCCGGGTAATGATG	up	5.54042	2.47	0.0114944	186.39	1032.68	840.45	1113.41	1144.18	168.737	176.779	213.655	1100	1842	2776	78	106	131	middle
hsa-miR-200b-3p	TAATACTGCCTGGTAATGATGA	up	5.25378	2.39336	0.0278521	456.855	2400.22	1872.68	2200.23	3127.74	307.188	665.424	397.953	2451	3640	7588.5	142	399	244	middle
hsa-miR-141-3p	TAACACTGTCTGGTAAAGATG	up	4.822	2.26963	0.0316071	203.493	981.241	1269.46	689.386	984.876	305.024	95.0605	210.393	1661.5	1140.5	2389.5	141	57	129	middle
hsa-miR-1287-5p	TGCTGGATCAGTGGTTCGAGT	up	4.58777	2.19779	0.0272077	222.512	1020.83	867.192	1314.1	881.216	168.737	283.514	215.286	1135	2174	2138	78	170	132	middle
hsa-miR-30d-3p	CTTTCAGTCAGATGTTTGCTGC	up	4.57777	2.19464	0.00901511	276.135	1264.08	1163.64	1508.13	1120.48	266.085	353.558	208.762	1523	2495	2718.5	123	212	128	middle
hsa-miR-149-5p	TCTGGCTCCGTGTCTTCACTC	up	4.43428	2.1487	0.0439509	24.6565	109.334	65.7079	119.683	142.61	10.8165	53.3673	9.78573	86	198	346	5	32	6	middle
hsa-miR-200b-5p	CATCTTACTGGGCAGCATTGG	up	4.10619	2.0378	0.00349714	26.7049	109.655	100.854	100.34	127.772	32.4494	16.6773	30.9881	132	166	310	15	10	19	middle
hsa-miR-27b-5p	AGAGCTTAGCTGATTGGTGA	up	4.07304	2.02611	0.0456263	134.912	549.502	415.641	755.575	477.291	101.675	208.466	94.5954	544	1250	1158	47	125	58	middle
hsa-miR-616-5p	ACTCAAAACCCTTCAGTGACTT	up	3.80212	1.9268	0.0146463	26.9331	102.403	80.2248	122.705	104.279	0	40.0255	40.7739	105	203	253	0	24	25	middle
hsa-miR-181c-3p	ACCATCGACCGTTGAGTGGACC	up	3.541	1.82416	0.013561	175.496	621.432	505.798	704.8	653.699	147.104	193.456	185.929	662	1166	1586	68	116	114	middle
hsa-miR-3124-5p	TTCGCGGGCGAAGGCAAAGTCG	up	3.49993	1.80733	0.0335536	28.0055	98.0174	123.011	99.7358	71.3051	28.1228	20.0127	35.881	161	165	173	13	12	22	middle
hsa-miR-181d-5p	AACATTCATTGTTGTCGGTGGGTT	up	3.43953	1.78221	0.00114449	392.018	1348.36	1276.34	1258.49	1510.25	468.713	421.379	285.961	1670.5	2082	3664.17	216.667	252.667	175.333	middle
hsa-miR-1301-3p	TTGCAGCTGCCTGGGAGTGA	up	3.41602	1.77232	0.0311618	579.941	1981.09	2496.14	1735.4	1711.73	545.15	628.734	565.941	3267	2871	4153	252	377	347	middle
hsa-miR-24-2-5p	GTGCCTACTGAGCTGAAACACA	up	3.38259	1.75813	0.0127014	514.36	1739.87	1816.52	1949.99	1453.1	497.557	484.475	561.048	2377.5	3226	3525.5	230	290.5	344	middle
hsa-miR-2355-3p	TGTCCTTGCTGTTTGGAGAT	up	3.27874	1.71314	0.027331	219.587	719.967	764.045	530.716	865.141	270.412	230.147	158.203	1000	878	2099	125	138	97	middle
hsa-miR-450b-5p	TTTTGCAATATGTTCCTGAAT	up	3.20815	1.68174	0.03825	720.037	2309.99	2860.59	2409.98	1659.39	614.375	647.079	898.656	3744	3987	4026	284	388	551	middle
hsa-miR-125b-2-3p	ACAAGTCAGGCTCTTGGGACCT	up	3.15004	1.65537	0.0470983	475.056	1496.44	1320.27	2036.42	1132.64	458.618	712.12	254.429	1728	3369	2748	212	427	156	middle
hsa-miR-1304-3p	TCTCACTGTAGCATCGAACCCC	up	2.73685	1.45251	0.0409563	83.9881	229.862	265.124	165.622	258.842	95.1849	83.3864	73.3929	347	274	628	44	50	45	middle
hsa-miR-223-5p	CGTGTATTTGACAAGCTGAGTTG	up	2.73081	1.44933	0.00579275	851.329	2324.82	2596.23	2413	1965.22	835.031	1032.32	686.632	3398	3992	4768	386	619	421	middle
hsa-miR-7706	TGAAGCGCCTGTGCTCTGCCGAG	up	2.57717	1.36579	0.0269057	101.401	261.328	258.247	279.26	246.477	84.3684	58.3705	161.464	338	462	598	39	35	99	middle
hsa-miR-548e-5p	CAAAAGCAATCGCGGTTTTTGC	up	2.5039	1.32417	0.0043707	29.808	74.6361	71.0562	70.3498	82.5023	21.6329	27.0172	40.7739	93	116.385	200.167	10	16.2	25	middle
hsa-miR-33a-5p	GTGCATTGTAGTTGCATTGC	up	2.47067	1.3049	0.0436091	111.977	276.658	259.775	263.544	306.653	101.675	46.6964	187.56	340	436	744	47	28	115	middle
hsa-miR-197-3p	TTCACCACCTTCTCCACCCAGC	up	2.39962	1.26281	0.0485629	988.819	2372.79	3028.68	2187.54	1902.16	1055.69	1077.35	833.418	3964	3619	4615	488	646	511	middle
hsa-miR-664a-5p	ACTGGCTAGGGAAAATGATTGG	up	2.19329	1.1331	0.018252	221.196	485.148	442.382	553.081	459.98	142.777	320.204	200.607	579	915	1116	66	192	123	middle
hsa-miR-99b-3p	CAAGCTCGTGTCTGTGGGTCC	up	2.1173	1.08222	0.00109885	169.92	359.77	348.405	382.623	348.282	155.757	151.763	202.238	456	633	845	72	91	124	middle
hsa-miR-144-5p	GGATATCATCATATACTGTAAGT	down	0.0745924	-3.74483	1.22368e-07	54714.7	4081.3	3956.99	3429.1	4857.81	53846.5	55151.8	55145.8	5179	5673	11786	24891	33070	33812	high
hsa-miR-182-5p	TTTGGCAATGGTAGAACTCA	down	0.0801409	-3.64132	0.0268328	28645.8	2295.7	1434.88	2101.71	3350.52	36525	28593.2	20819.1	1878	3477	8129	16884	17145	12765	high
hsa-miR-144-3p	TACAGTATAGATGATGTACT	down	0.090137	-3.47174	0.0187844	342884	30906.5	22748.7	24738.7	45232.2	345817	262272	420563	29774	40927	109742	159857	157263	257863	high
hsa-miR-183-5p	TATGGCACTGGTAGAATTCACT	down	0.0968378	-3.36829	0.0105379	10242.3	991.847	803.012	1048.13	1124.39	12192.3	9049.09	9485.63	1051	1734	2728	5636	5426	5816	high
hsa-miR-96-5p	TTTGGCACTAGCACATTTTTG	down	0.146967	-2.76643	0.0370318	53000.5	7789.35	5151.96	6407.88	11808.2	71849.4	46464.6	40687.4	6743	10601	28649	33213	27861	24947	high
hsa-miR-451a	AAACCGTTACCATTACTGAGT	down	0.214463	-2.2212	0.0081903	3.58671e+06	769214	648930	460474	1.19824e+06	4.32211e+06	2.91782e+06	3.5202e+06	849334	761795	2907160	1997930	1749575	2158366	high
hsa-let-7f-5p	TGAGGTAGTAGATTGTATAGTT	down	0.228583	-2.12921	0.000891134	82388.9	18832.7	12307	16695.1	27496.1	77647.8	92950.3	76568.6	16107.6	27619.8	66710.9	35893.3	55734.7	46947.1	high
hsa-let-7a-5p	TGAGGTAGTAGGTTGTATAGTT	down	0.239588	-2.06137	0.0018071	76100.2	18232.7	12028.1	17296.1	25373.9	68170.7	87038.3	73091.6	15742.6	28614.1	61562	31512.5	52189.8	44815.2	high
hsa-miR-363-3p	AATTGCACGGTATCCATCTGT	down	0.266364	-1.90853	0.0016814	74199.7	19764.1	18703.1	12940.3	27649.1	78235.5	71282	73081.4	24479	21408	67082	36165	42742	44809	high
hsa-miR-106b-5p	TAAAGTGCTGACAGTGCAGA	down	0.272226	-1.87712	0.00791631	61992.1	16875.9	13381.9	13283.6	23962.2	66532.1	49251.4	70193	17514.5	21976	58137	30755	29532	43038	high
hsa-miR-16-2-3p	ACCAATATTACTGTGCTGCTT	down	0.277724	-1.84828	0.00648599	40599.4	11275.4	9578.84	7769.72	16477.7	41191.2	39578.5	41028.3	12537	12854	39978	19041	23732	25156	high
hsa-miR-16-5p	TAGCAGCACGTAAATATTGGCG	down	0.285522	-1.80833	0.0140284	205994	58816	51910.4	40044.1	84493.5	256703	179352	181928	67941.5	66247.8	204998	118663	107543	111547	high
hsa-miR-486-5p	TCCTGTACTGAGCTGCCCCGAG	down	0.286859	-1.80159	0.000394605	367462	105410	94292.4	83693.8	138242	396503	337283	368598	123412	138460	335403	183287	202241	226002	high
hsa-let-7b-5p	TGAGGTAGTAGGTTGTGTGGTT	down	0.291732	-1.77728	0.00204084	141051	41149.2	28835.2	41998.4	52614	147777	154157	121219	37740.1	69480.9	127652	68311.1	92435.5	74324.1	high
hsa-miR-150-5p	TCTCCCAACCCTTGTACCAGTG	down	0.304712	-1.71448	0.00356875	14928.2	4548.8	3095.15	4860.46	5690.81	16105.7	12511.3	16167.7	4051	8041	13807	7445	7502	9913	high
hsa-let-7d-5p	AGAGGTAGTAGGTTGCATAGTT	down	0.317374	-1.65574	0.010165	27441.1	8709.11	5321.39	7205.01	13600.9	22215.9	32888.4	27219	6964.75	11919.8	32998.5	10269.5	19720.5	16689	high
hsa-miR-15b-3p	CGAATCATTATTTGCTGCTCT	down	0.320108	-1.64337	0.00592556	9980.71	3194.91	2503.01	2056.98	5024.74	9094.48	9134.15	11713.5	3276	3403	12191	4204	5477	7182	high
hsa-miR-106b-3p	CCGCACTGTGGGTACTTGCT	down	0.320118	-1.64332	0.000180021	26972.5	8634.41	8019.42	7856.16	10027.6	28880	25908.2	26129.5	10496	12997	24329	13350	15535	16021	high
hsa-miR-15b-5p	TAGCAGCACATCATGGTTT	down	0.340137	-1.55581	0.0194879	61032.7	20759.5	18009.3	14663.9	29605.2	71861.3	45486.5	65750.3	23571	24259.5	71828	33218.5	27274.5	40314	high
hsa-miR-185-5p	TGGAGAGAAAGGCAGTTCCTGA	down	0.347029	-1.52687	0.00519702	179528	62301.4	49259.5	44574.1	93070.5	197437	162972	178174	64472	73742	225807	91267	97721	109245	high
hsa-let-7g-5p	TGAGGTAGTAGTTTGTACAGTT	down	0.350073	-1.51427	0.00362884	172707	60460.2	45338.9	49038.4	87003.2	186336	175447	156339	59340.6	81127.7	211087	86135.3	105201	95857.2	high
hsa-miR-374a-5p	TTATAATACAACCTGATAAGT	down	0.38678	-1.37041	0.0111934	15738.2	6087.22	3555.1	5537.46	9169.09	15119.3	14041.4	18053.8	4653	9161	22246	6989	8419.5	11069.5	high
hsa-miR-26b-5p	TTCAAGTAATTCAGGATAGGTT	down	0.409912	-1.28661	0.0178653	219702	90058.5	51932.7	79699.4	138543	248050	228449	182608	67970.7	131852	336133	114663	136982	111964	high
hsa-miR-126-3p	TCGTACCGTGAGTAATAATGC	down	0.448157	-1.15793	0.0271064	186370	83523.1	62663.2	63031.8	124874	199066	173305	186739	82015	104278	302969	92020	103917	114497	high
hsa-miR-92a-3p	TATTGCACTTGTCCCGGCCTGT	down	0.499504	-1.00143	0.00148525	453767	226659	245112	186125	248740	478807	470505	411990	320808	307919	603490	221332	282123	252607	high
hsa-miR-3200-5p	AATCTGAGAAGGCGCACAAGGT	down	0.0669243	-3.90133	0.0299731	188.008	12.5823	16.809	3.62676	17.3111	250.942	145.092	167.988	22	6	42	116	87	103	middle
hsa-miR-190a-5p	TGATATGTTTGATATATTAGGT	down	0.0851053	-3.55461	0.015937	1026.51	87.3618	61.8877	68.3039	131.894	865.317	933.928	1280.3	81	113	320	400	560	785	middle
hsa-miR-183-3p	TGAATTACCGAAGGGCCATAA	down	0.097837	-3.35348	0.0294488	553.575	54.1601	34.382	39.8943	88.204	737.683	440.28	482.763	45	66	214	341	264	296	middle
hsa-miR-3688-3p	TATGGAAAGACTTTGCCACT	down	0.147495	-2.76126	0.00583939	186.672	27.5331	23.3034	16.0182	43.2777	209.839	200.127	150.048	30.5	26.5	105	97	120	92	middle
hsa-miR-18b-5p	TAAGGTGCATCTAGTGCAGTT	down	0.147626	-2.75998	0.0190331	432.419	63.8363	56.1573	51.6813	83.6701	387.229	367.734	542.292	73.5	85.5	203	179	220.5	332.5	middle
hsa-miR-454-3p	TAGTGCAATATTGCTTATAGGGT	down	0.14897	-2.74691	0.0108961	1520.2	226.465	130.652	201.285	347.458	1784.72	1184.09	1591.81	171	333	843	825	710	976	middle
hsa-mir-451a-p3	TTTAGTAATGGTAATGGTTCT	down	0.187344	-2.41624	0.00057107	1304.21	244.337	224.629	163.809	344.573	1451.57	1255.8	1205.28	294	271	836	671	753	739	middle
hsa-miR-486-3p	CGGGGCAGCTCAGTACAGGAT	down	0.192791	-2.37489	0.000818757	2426.44	467.796	289.955	453.345	660.087	2678.16	2451.56	2149.6	379.5	750	1601.5	1238	1470	1318	middle
hsa-miR-1294	TGTGAGGTTGGCATTGTTGT	down	0.199693	-2.32415	0.00754616	326.903	65.2802	49.6629	51.3791	94.7987	266.085	381.91	332.715	65	85	230	123	229	204	middle
hsa-miR-4732-3p	GCCCTGACCTGTCCTGTTCTG	down	0.209248	-2.25671	0.000188421	927.795	194.139	175.73	140.839	265.848	850.174	985.627	947.585	230	233	645	393	591	581	middle
hsa-miR-4508	AAGCGGGGCTGGGCGCGC	down	0.227261	-2.13758	0.00647092	790.94	179.75	183.371	154.742	201.138	757.152	712.12	903.549	240	256	488	350	427	554	middle
hsa-miR-624-5p	TAGTACCAGTACCTTGTGTTC	down	0.227663	-2.13503	0.0142854	494.221	112.516	87.8652	103.363	146.32	581.926	390.248	510.489	115	171	355	269	234	313	middle
hsa-miR-7976	TGCCCTGAGACTTTTGCTCT	down	0.247246	-2.01598	0.00672858	803.488	198.659	220.809	158.368	216.8	923.726	782.165	704.572	289	262	526	427	469	432	middle
hsa-miR-18a-3p	ACTGCCCTAAGTGCTCCTTCT	down	0.24995	-2.00029	0.0254302	653.894	163.441	146.697	140.839	202.787	534.333	603.718	823.632	192	233	492	247	362	505	middle
hsa-miR-550a-3-5p	AGTGCCTGAGGGAGTAAGAGC	down	0.259441	-1.94652	0.0196333	269.266	69.8588	71.0562	57.3229	81.1971	298.246	302.693	206.859	93	94.8333	197	137.867	181.5	126.833	middle
hsa-miR-4732-5p	TGTAGAGCAGGGAGCAGGAAGCT	down	0.265098	-1.9154	0.0105908	1072.66	284.359	284.989	184.36	383.729	1267.69	1094.03	856.251	373	305	931	586	656	525	middle
hsa-miR-18a-5p	TAAGGTGCATCTAGTGCAGA	down	0.270699	-1.88524	0.00521399	4419.2	1196.27	930.225	884.627	1773.97	4627.28	3593.12	5037.2	1217.5	1463.5	4304	2139	2154.5	3088.5	middle
hsa-miR-1285-3p	TCTGGGCAACAAAGTGAGA	down	0.275115	-1.86189	0.0212748	461.896	127.075	121.101	110.918	149.205	555.966	461.127	368.596	158.5	183.5	362	257	276.5	226	middle
hsa-miR-3200-3p	CACCTTGCGCTACTCAGGTCT	down	0.285218	-1.80986	0.0233255	310.411	88.5347	57.3034	101.549	106.752	382.903	236.817	311.512	75	168	259	177	142	191	middle
hsa-miR-550a-3-5p	AGTGCCTGAGGGAGTAAGAG	down	0.307344	-1.70207	0.0281108	198.347	60.9606	57.3034	50.9761	74.6024	222.531	226.811	145.699	75	84.3333	181	102.867	136	89.3333	middle
hsa-miR-374a-3p	CTTATCAGATTGTATTGTAATT	down	0.336348	-1.57197	0.0163156	1477.8	497.055	375.146	574.841	541.177	1157.36	1676.07	1599.97	491	951	1313	535	1005	981	middle
hsa-miR-362-5p	AATCCTTGGAACCTAGGTGTGA	down	0.344945	-1.53556	0.0195511	512.103	176.648	174.202	178.92	176.82	454.291	475.303	606.715	228	296	429	210	285	372	middle
hsa-miR-20b-5p	CAAAGTGCTCATAGTGCAGGTAG	down	0.346191	-1.53036	0.0397477	5812.69	2012.3	1831.16	1388.65	2817.1	6110.94	4050.36	7276.77	2396.67	2297.33	6834.83	2824.83	2428.67	4461.67	middle
hsa-miR-7-5p	TGGAAGACTAGTGATTTTGTTGT	down	0.365377	-1.45254	0.00147341	2731.27	997.941	1000.64	954.24	1038.94	2875.74	2567.19	2750.88	1309.67	1578.67	2520.67	1329.33	1539.33	1686.67	middle
hsa-miR-3143	ATAACATTGTAAAGCGCTTCT	down	0.369869	-1.43491	0.026729	355.673	131.553	157.393	78.5798	158.685	257.432	398.587	411.001	206	130	385	119	239	252	middle
hsa-miR-942-5p	TCTTCTCTGTTTTGGCCATGT	down	0.392598	-1.34887	0.0122926	1146.32	450.045	368.27	321.573	660.293	1090.3	1114.04	1234.63	482	532	1602	504	668	757	middle
hsa-miR-625-5p	AGGGGGAAAGTTCTATAGTC	down	0.402911	-1.31147	0.0144241	445.587	179.532	123.775	154.742	260.078	445.638	471.967	419.155	162	256	631	206	283	257	middle
hsa-mir-106a-p3	TACTGCAATGTAAGCACTTCT	down	0.403438	-1.30958	0.0298544	1300.46	524.656	505.034	416.473	652.462	1274.18	1023.99	1603.23	661	689	1583	589	614	983	middle
hsa-miR-576-5p	ATTCTAATTTCTCCACGTCTTT	down	0.405542	-1.30208	0.0162158	998.917	405.103	395.011	321.573	498.724	1157.36	798.842	1040.55	517	532	1210	535	479	638	middle
hsa-miR-148b-5p	GAAGTTCTGTTATACACTCAGG	down	0.412984	-1.27584	0.023702	240.317	99.2469	90.9214	76.1619	130.657	298.534	221.808	200.607	119	126	317	138	133	123	middle
hsa-miR-196b-5p	TAGGTAGTTTCCTGTTGTTGG	down	0.479996	-1.05891	0.0118984	926.744	444.834	303.326	481.754	549.42	1085.97	873.89	820.37	397	797	1333	502	524	503	middle

## Sheet: Supplemental Tabel4
miR-208b-3p
_MEMBER_MyList	_LogP_MyList	GO	_PATTERN_	_RANK_	GiniIndex	Category	CategoryID	Description	PARENT_GO	LogP	Enrichment	Z-score	#TotalGeneInLibrary	#GeneInGO	#GeneInHitList	#GeneInGOAndHitList	%InGO	STDV %InGO	GeneID	Hits	Log(q-value)	EvidenceCutoff	GROUP_ID	FirstInGroupByEnrichment	FirstInGroupByLogP	BestLogPInGroup	BestEnrichmentInGroup	URL
1	-3.17197	GO:0002026	M1	1	0	GO Biological Processes	19	regulation of the force of heart contraction	19_GO:0032501 multicellular organismal process	-3.17197	9.83344	5.68082	30169	26	472	4	0.847458	0.42193	477|488|493|817	ATP1A2|ATP2A2|ATP2B4|CAMK2D	-1.41752	0	30	0	0	-5.16354	13.6966
1	-3.01397	GO:0003188	M1	1	0	GO Biological Processes	19	heart valve formation	19_GO:0032502 developmental process	-3.01397	14.7502	6.25145	30169	13	472	3	0.635593	0.365792	2626|2702|4089	GATA4|GJA5|SMAD4	-1.31751	0	105	0	0	-3.12202	14.7502
1	-2.64198	GO:0003007	M1	1	0	GO Biological Processes	19	heart morphogenesis	19_GO:0032502 developmental process	-2.64198	2.77902	3.58242	30169	253	472	11	2.33051	0.694439	2303|2626|2702|3084|4089|4193|4886|5727|7168|7273|27250	FOXC2|GATA4|GJA5|NRG1|SMAD4|MDM2|NPY1R|PTCH1|TPM1|TTN|PDCD4	-1.07814	0	105	0	0	-3.12202	14.7502
1	-2.21951	WP1528	M1	1	0	WikiPathways	27	Physiological and pathological hypertrophy of the heart		-2.21951	7.98967	4.3186	30169	24	472	3	0.635593	0.365792	817|2626|5599	CAMK2D|GATA4|MAPK8	-0.812283	0	123	0	0	-2.82525	7.98967
1	-6.08655	GO:0086004	M1	1	0	GO Biological Processes	19	regulation of cardiac muscle cell contraction	19_GO:0032501 multicellular organismal process	-6.08655	13.1595	8.94347	30169	34	472	7	1.48305	0.556368	477|488|817|1739|1824|2626|2702	ATP1A2|ATP2A2|CAMK2D|DLG1|DSC2|GATA4|GJA5	-3.2012	0	21	1	1	-6.08655	13.1595
1	-3.95294	GO:0098901	M1	1	0	GO Biological Processes	19	regulation of cardiac muscle cell action potential	19_GO:0050789 regulation of biological process	-3.95294	10.3093	6.53772	30169	31	472	5	1.05932	0.471227	488|817|1739|1824|2702	ATP2A2|CAMK2D|DLG1|DSC2|GJA5	-1.91628	0	21	0	0	-6.08655	13.1595
1	-2.51428	GO:0010666	M1	1	0	GO Biological Processes	19	positive regulation of cardiac muscle cell apoptotic process	19_GO:0048518 positive regulation of biological process	-2.51428	10.0922	4.99794	30169	19	472	3	0.635593	0.365792	488|817|4089	ATP2A2|CAMK2D|SMAD4	-0.99132	0	21	0	0	-6.08655	13.1595
1	-2.08203	GO:0010665	M1	1	0	GO Biological Processes	19	regulation of cardiac muscle cell apoptotic process	19_GO:0050789 regulation of biological process	-2.08203	5.01313	3.61612	30169	51	472	4	0.847458	0.42193	488|817|2626|4089	ATP2A2|CAMK2D|GATA4|SMAD4	-0.717465	0	21	0	0	-6.08655	13.1595
1	-3.667	WP2795	M1	1	0	WikiPathways	27	Cardiac hypertrophic response		-3.667	6.9728	5.58938	30169	55	472	6	1.27119	0.515651	208|817|1147|3084|5599|9759	AKT2|CAMK2D|CHUK|NRG1|MAPK8|HDAC4	-1.72919	0	24	0	0	-5.37534	18.2621
1	-3.6293	WP1544	M1	1	0	WikiPathways	27	MicroRNAs in cardiomyocyte hypertrophy		-3.6293	4.91672	5.04425	30169	104	472	8	1.69492	0.594143	208|817|1147|2626|3084|4040|5599|9759	AKT2|CAMK2D|CHUK|GATA4|NRG1|LRP6|MAPK8|HDAC4	-1.70868	0	24	0	0	-5.37534	18.2621
1	-4.3416	R-HSA-5576891	M1	1	0	Reactome Gene Sets	6	Cardiac conduction		-4.3416	4.84223	5.57737	30169	132	472	10	2.11864	0.662839	477|488|490|493|817|2626|6263|6326|6328|80228	ATP1A2|ATP2A2|ATP2B1|ATP2B4|CAMK2D|GATA4|RYR3|SCN2A|SCN3A|ORAI2	-2.11468	0	30	0	0	-5.16354	13.6966
1	-3.87593	hsa04261	M1	1	0	KEGG Pathway	24	Adrenergic signaling in cardiomyocytes		-3.87593	4.26116	5.04786	30169	150	472	10	2.11864	0.662839	208|477|488|490|493|817|2773|5527|7168|9252	AKT2|ATP1A2|ATP2A2|ATP2B1|ATP2B4|CAMK2D|GNAI3|PPP2R5C|TPM1|RPS6KA5	-1.86465	0	30	0	0	-5.16354	13.6966
1	-3.16753	WP536	M1	1	0	WikiPathways	27	Calcium regulation in cardiac cells		-3.16753	3.78458	4.33896	30169	152	472	9	1.90678	0.629504	488|490|817|2702|2767|2773|5573|6263|26575	ATP2A2|ATP2B1|CAMK2D|GJA5|GNA11|GNAI3|PRKAR1A|RYR3|RGS17	-1.41418	0	30	0	0	-5.16354	13.6966
1	-4.80428	GO:0003300	M1	1	0	GO Biological Processes	19	cardiac muscle hypertrophy	19_GO:0032501 multicellular organismal process	-4.80428	10.9573	7.43077	30169	35	472	6	1.27119	0.515651	488|2626|3066|3952|7273|9759	ATP2A2|GATA4|HDAC2|LEP|TTN|HDAC4	-2.39606	0	37	1	1	-4.80428	10.9573
1	-2.62996	GO:0010613	M1	1	0	GO Biological Processes	19	positive regulation of cardiac muscle hypertrophy	19_GO:0048518 positive regulation of biological process	-2.62996	7.10193	4.61833	30169	36	472	4	0.847458	0.42193	817|7222|8013|9472	CAMK2D|TRPC3|NR4A3|AKAP6	-1.07039	0	40	0	0	-4.6572	11.2795
miR-143-3p
_MEMBER_MyList	_LogP_MyList	GO	_PATTERN_	_RANK_	GiniIndex	Category	CategoryID	Description	PARENT_GO	LogP	Enrichment	Z-score	#TotalGeneInLibrary	#GeneInGO	#GeneInHitList	#GeneInGOAndHitList	%InGO	STDV %InGO	GeneID	Hits	Log(q-value)	EvidenceCutoff	GROUP_ID	FirstInGroupByEnrichment	FirstInGroupByLogP	BestLogPInGroup	BestEnrichmentInGroup	URL
1	-8.98341	GO:0007507	M1	1	0	GO Biological Processes	19	heart development	19_GO:0032502 developmental process	-8.98341	2.04709	6.80583	30169	556	2094	79	3.77268	0.416376	88|94|148|163|287|472|657|775|841|983|998|1289|2065|2066|2254|2335|2737|3084|3624|4087|4208|4522|4772|4916|5125|5138|5155|5311|5469|5573|5594|5595|5663|5727|5754|5781|6464|6608|6789|6901|7029|7132|7135|7157|7168|7249|7273|7468|7849|8543|8828|8913|10087|10203|10269|10611|10818|10959|23059|23768|25831|26160|26585|27295|50507|54583|55036|55717|57167|57493|78987|79659|79977|84516|157378|164781|203286…	ACTN2|ACVRL1|ADRA1A|AP2B1|ANK2|ATM|BMPR1A|CACNA1C|CASP8|CDK1|CDC42|COL5A1|ERBB3|ERBB4|FGF9|FN1|GLI3|NRG1|INHBA|SMAD2|MEF2C|MTHFD1|NFATC1|NTRK3|PCSK5|PDE2A|PDGFB|PKD2|MED1|PRKAR1A|MAPK1|MAPK3|PSEN1|PTCH1|PTK7|PTPN11|SHC1|SMO|STK4|TAFAZZIN|TFDP2|TNFRSF1A|TNNI1|TP53|TPM1|TSC2|TTN|NSD2|PAX8|LMO4|NRP2|CACNA1G|CERT1|CALCRL|ZMPSTE24|PDLIM5|FRS2|TMED2|CLUAP1|FLRT2|HECTD1|IFT172|GREM1|PDLIM3|NOX4|EGLN1|CC…	-6.75519	0	59	1	1	-8.98341	2.53102
1	-2.95738	GO:0002027	M1	1	0	GO Biological Processes	19	regulation of heart rate	19_GO:0032501 multicellular organismal process	-2.95738	2.28902	3.64791	30169	107	2094	17	0.811843	0.1961	148|287|488|775|801|1824|3752|6330|6505|6720|7168|8913|10008|10142|29098|29119|51086	ADRA1A|ANK2|ATP2A2|CACNA1C|CALM1|DSC2|KCND3|SCN4B|SLC1A1|SREBF1|TPM1|CACNA1G|KCNE3|AKAP9|RANGRF|CTNNA3|TNNI3K	-1.77443	0	91	0	0	-7.39487	3.71803
1	-2.74283	GO:0060047	M1	1	0	GO Biological Processes	19	heart contraction	19_GO:0032501 multicellular organismal process	-2.74283	2.32377	3.49176	30169	93	2094	15	0.716332	0.184293	287|775|998|2132|3752|5608|6330|6505|6901|7135|7168|7273|8913|10008|29098	ANK2|CACNA1C|CDC42|EXT2|KCND3|MAP2K6|SCN4B|SLC1A1|TAFAZZIN|TNNI1|TPM1|TTN|CACNA1G|KCNE3|RANGRF	-1.61519	0	171	0	0	-5.11244	2.32377
1	-2.69475	GO:0086091	M1	1	0	GO Biological Processes	19	regulation of heart rate by cardiac conduction	19_GO:0023052 signaling	-2.69475	3.08729	3.69685	30169	42	2094	9	0.429799	0.142958	287|775|1824|3752|6330|8913|10008|10142|29119	ANK2|CACNA1C|DSC2|KCND3|SCN4B|CACNA1G|KCNE3|AKAP9|CTNNA3	-1.58501	0	91	0	0	-7.39487	3.71803
1	-2.41823	GO:0003015	M1	1	0	GO Biological Processes	19	heart process	19_GO:0032501 multicellular organismal process	-2.41823	2.09562	3.1439	30169	110	2094	16	0.764088	0.190291	287|775|998|2132|3752|5608|6330|6505|6901|7135|7168|7273|8913|10008|29098|50507	ANK2|CACNA1C|CDC42|EXT2|KCND3|MAP2K6|SCN4B|SLC1A1|TAFAZZIN|TNNI1|TPM1|TTN|CACNA1G|KCNE3|RANGRF|NOX4	-1.37886	0	0
1	-2.00081	GO:0003007	M1	1	0	GO Biological Processes	19	heart morphogenesis	19_GO:0032502 developmental process	-2.00081	1.59449	2.59331	30169	253	2094	28	1.33715	0.251003	94|657|998|1289|3084|4208|5311|5469|5663|5727|6608|6901|7135|7157|7168|7273|7468|8828|10087|10269|10959|23059|23768|26160|54583|55036|57493|79977	ACVRL1|BMPR1A|CDC42|COL5A1|NRG1|MEF2C|PKD2|MED1|PSEN1|PTCH1|SMO|TAFAZZIN|TNNI1|TP53|TPM1|TTN|NSD2|NRP2|CERT1|ZMPSTE24|TMED2|CLUAP1|FLRT2|IFT172|EGLN1|CCDC40|HEG1|GRHL2	-1.06998	0	0
1	-4.11365	WP2795	M1	1	0	WikiPathways	27	Cardiac hypertrophic response		-4.11365	3.40537	4.8762	30169	55	2094	13	0.620821	0.17165	208|801|3084|4214|4773|5594|5595|5598|5608|6885|7132|9759|11184	AKT2|CALM1|NRG1|MAP3K1|NFATC2|MAPK1|MAPK3|MAPK7|MAP2K6|MAP3K7|TNFRSF1A|HDAC4|MAP4K1	-2.67334	0	46	0	0	-9.70358	3.40537
1	-3.80905	GO:0003231	M1	1	0	GO Biological Processes	19	cardiac ventricle development	19_GO:0032502 developmental process	-3.80905	2.40123	4.30451	30169	126	2094	21	1.00287	0.217743	163|657|3084|4208|5138|5469|5754|7135|7168|7468|7849|8543|10269|10818|25831|54583|57167|57493|79977|84516|157378	AP2B1|BMPR1A|NRG1|MEF2C|PDE2A|MED1|PTK7|TNNI1|TPM1|NSD2|PAX8|LMO4|ZMPSTE24|FRS2|HECTD1|EGLN1|SALL4|HEG1|GRHL2|DCTN5|TMEM65	-2.42968	0	59	0	0	-8.98341	2.53102
1	-3.00471	GO:0098901	M1	1	0	GO Biological Processes	19	regulation of cardiac muscle cell action potential	19_GO:0050789 regulation of biological process	-3.00471	3.71803	4.13503	30169	31	2094	8	0.382044	0.134815	287|488|775|801|1824|10142|29098|29119	ANK2|ATP2A2|CACNA1C|CALM1|DSC2|AKAP9|RANGRF|CTNNA3	-1.81368	0	91	0	0	-7.39487	3.71803
1	-2.72404	GO:0014887	M1	1	0	GO Biological Processes	19	cardiac muscle adaptation	19_GO:0032501 multicellular organismal process	-2.72404	5.14548	4.23703	30169	14	2094	5	0.238777	0.106657	488|2146|9759|22876|23125	ATP2A2|EZH2|HDAC4|INPP5F|CAMTA2	-1.60748	0	390	0	0	-2.72404	5.14548
1	-2.72404	GO:0014898	M1	1	0	GO Biological Processes	19	cardiac muscle hypertrophy in response to stress	19_GO:0032501 multicellular organismal process	-2.72404	5.14548	4.23703	30169	14	2094	5	0.238777	0.106657	488|2146|9759|22876|23125	ATP2A2|EZH2|HDAC4|INPP5F|CAMTA2	-1.60748	0	390	1	1	-2.72404	5.14548
1	-2.2446	GO:0055118	M1	1	0	GO Biological Processes	19	negative regulation of cardiac muscle contraction	19_GO:0048519 negative regulation of biological process	-2.2446	7.20368	4.15039	30169	6	2094	3	0.143266	0.0826557	5294|8654|80149	PIK3CG|PDE5A|ZC3H12A	-1.2476	0	0
1	-2.00179	GO:0010659	M1	1	0	GO Biological Processes	19	cardiac muscle cell apoptotic process	19_GO:0009987 cellular process	-2.00179	4.43303	3.38115	30169	13	2094	4	0.191022	0.0954197	317|664|7157|57103	APAF1|BNIP3|TP53|TIGAR	-1.07049	0	0
1	-3.40227	GO:0003279	M1	1	0	GO Biological Processes	19	cardiac septum development	19_GO:0032502 developmental process	-3.40227	2.42367	4.02896	30169	107	2094	18	0.859599	0.201737	163|287|657|5138|5754|6608|7157|7468|7849|8543|8828|10818|25831|54583|57167|57493|78987|84516	AP2B1|ANK2|BMPR1A|PDE2A|PTK7|SMO|TP53|NSD2|PAX8|LMO4|NRP2|FRS2|HECTD1|EGLN1|SALL4|HEG1|CRELD1|DCTN5	-2.12462	0	59	0	0	-8.98341	2.53102
